# Supplementary material
Source: HighWire-hosted journal article supplement (https://rapm.bmj.com/highwire/filestream/17045/field_highwire_adjunct_files/2/rapm-2021-102910supp003_data_supplement.pdf)
Supplement: rapm-2021-102910supp003_data_supplement.pdf [file rapm-2021-102910supp003_data_supplement.pdf]

Supplemental Table 3: Self-reported side effects in the last 7 days at days 7 through 28 of follow-up following joint, bone or spine surgery.

|                                                  | Day 7    |         |         | Day 14  |         |                      | Day 21  |         |                      | Day 28  |         |         |
|--------------------------------------------------|----------|---------|---------|---------|---------|----------------------|---------|---------|----------------------|---------|---------|---------|
|                                                  | Class 1  | Class 2 | Class 3 | Class 1 | Class 2 | Class 3              | Class 1 | Class 2 | Class 3              | Class 1 | Class 2 | Class 3 |
| Number of subjects                               | 322      | 9       | 67      | 291     | 7       | 62                   | 249     | 66      | 56                   | 215     | 6       | 52      |
| Opioid related side effects n(%)                 |          |         |         |         |         |                      |         |         |                      |         |         |         |
| Dizziness                                        | 73 (23)  | 0 (0)   | 24 (36) | 48 (16) | 1 (14)  | 15 (24)              | 31 (12) | 1 (17)  | 13 (23)              | 11 (5)  | 0 (0)   | 6 (11)  |
| Nausea                                           | 62 (19)  | 0 (0)   | 22 (33) | 28 (10) | 1 (14)  | 15 (24) <sup>†</sup> | 23 (9)  | 2 (33)  | 14 (25) <sup>†</sup> | 9 (4)   | 0 (0)   | 8 (15)  |
| Vomiting                                         | 18 (6)   | 0 (0)   | 2 (3)   | 3 (1)   | 0 (0)   | 0 (0)                | 3 (1)   | 0 (0)   | 0 (0)                | 2 (1)   | 0 (0)   | 0 (0)   |
| Constipation                                     | 153 (47) | 7 (78)  | 39 (58) | 75 (26) | 2 (28)  | 28 (45)              | 45 (18) | 1 (17)  | 21 (38) <sup>†</sup> | 31 (14) | 1 (17)  | 12 (23) |
| Difficulty urinating                             | 13 (4)   | 0 (0)   | 8 (12)  | 6 (2)   | 1 (14)  | 5 (8)                | 5 (2)   | 0 (0)   | 1 (2)                | 2 (1)   | 0 (0)   | 2 (4)   |
| Abdominal discomfort                             | 48 (15)  | 2 (22)  | 19 (28) | 30 (10) | 4 (57)  | 7 (11)               | 28 (11) | 1 (17)  | 9 (16)               | 12 (6)  | 1 (17)  | 8 (15)  |
| Drowsiness                                       | 154 (48) | 5 (56)  | 43 (64) | 96 (33) | 3 (43)  | 30 (48)              | 59 (24) | 1 (17)  | 22 (39)              | 37 (17) | 3 (50)  | 18 (35) |
| Sleeplessness                                    | 133 (41) | 3 (33)  | 34 (51) | 83 (28) | 2 (28)  | 20 (32)              | 44 (18) | 1 (17)  | 15 (27)              | 27 (13) | 2 (33)  | 11 (21) |
| Pruritus                                         | 55 (17)  | 2 (22)  | 22 (33) | 43 (15) | 1 (14)  | 10 (16)              | 23 (9)  | 1 (17)  | 9 (16)               | 20 (9)  | 1 (17)  | 12 (23) |
| Mood Changes                                     | 34 (11)  | 1 (11)  | 11 (16) | 31 (11) | 0 (0)   | 7 (11)               | 18 (7)  | 1 (17)  | 6 (11)               | 12 (6)  | 0 (0)   | 8 (15)  |
| Unscheduled contact with health care system n(%) |          |         |         |         |         |                      |         |         |                      |         |         |         |

|                |        |        |                      |        |       |        |        |        |        |        |       |        |
|----------------|--------|--------|----------------------|--------|-------|--------|--------|--------|--------|--------|-------|--------|
| Provider       | 24 (7) | 2 (22) | 14 (21) <sup>†</sup> | 27 (9) | 0 (0) | 8 (13) | 21 (8) | 1 (17) | 6 (11) | 13 (5) | 0 (5) | 5 (10) |
| Emergency room | 5 (1)  | 1 (11) | 0 (0)                | 2 (1)  | 0 (0) | 2 (3)  | 1 (1)  | 0 (0)  | 0 (0)  | 1 (1)  | 0 (0) | 0 (0)  |

Data presented as count(% of column). <sup>†</sup> = different from Trajectory 1, *P*=0.05 corrected for multiple comparisons.
